# Supplementary material for: Transcription Factor ChbZIP1 from Alkaliphilic Microalgae Chlorella sp. BLD Enhancing Alkaline Tolerance in Transgenic Arabidopsis thaliana
Source: PubMed Central journal article supplement (PMC7957498; doi:10.3390/ijms22052387), 2021-02-27
Supplement: ijms-22-02387-s001.pdf [file ijms-22-02387-s001.pdf]

Table S1 Primers used in this study.

| Name               | Sequence 5'-3'       |
|--------------------|----------------------|
| $\beta$ -tubulin-F | CAGTACCGTGCCCTGACA   |
| $\beta$ -tubulin-R | ATAGACATGCGGCCCTG    |
| AP2/2-F            | GAGCCCCTTGGAGTCGAG   |
| AP2/3-R            | TGACGGGGTTGGATCGAC   |
| AP2/3-F            | GCGTTCAGGCCCAAATC    |
| AP2/3-R            | GGGCCCTCTGAACCGAAT   |
| bZIP1-F            | GCGAAAGAAACGGAGGGC   |
| bZIP1-R            | GCACCGGTGTTGGGAAAG   |
| E2F1-F             | ACGAGTCCCACGAGCTG    |
| E2F1-R             | TCCCGAAGCTTTGAGTCG   |
| MYB5-F             | CCCATGGGTTCGAGGTGT   |
| MYB5-R             | AAGGAGAAACGGACGCGA   |
| SBP1-F             | TCCACGCCACGCTATCTC   |
| SBP1-R             | TTGATTGGCCCCATCGGT   |
| SBP2-F             | TCATATTTGCCCGGCCA    |
| SBP2-R             | CGAAGTGGAGGAAGGCGA   |
| ZF2-F              | CTGCCATGCTTCAACACG   |
| ZF2-R              | GACGTGGAACACCCAAGG   |
| ZF7-F              | CGGATGGGGAGCTTGGAA   |
| ZF7-R              | TACTTGCGAGACCCAGGC   |
| At-UBQ10-F         | AAACCCTAACGGGAAAGACG |
| At-UBQ11-R         | GAGTTCTGCCATCCTCCAAC |
| At-APX1-F          | GCATGGACATCAAACCCTCT |
| At-APX1-R          | AGCAAACCCAAGCTCAGAAA |
| At-CSD1-F          | ACATTTCAACCCCGATGGTA |
| At-CSD1-R          | CCAGTAGCCAGGCTGAGTTC |
| At-CAT1-F          | ACTCCAGACCCGGATCTTCT |
| At-CAT1-R          | CACGATTTCCAGAGCAGACA |
| At-PER10-F         | CGTTTCCTCAGCACTTCTCT |
| At-PER10           | CTCGCTGTACGACTTCACCA |
| At-GPX-F           | ACGAGGAACCGGAACTAAT  |
| At-GPX-R           | GAATGTCATCGCCGAAGATT |
| At-DHAR-F          | TAATGACGGATCCGAGAAGG |
| At-DHAR-R          | AAGCTCTCAGGGACAGACCA |
| At-APXT-F          | TGGAGAAGCAGGAGGACAGT |
| At-APXT-R          | GCAGCCACATCTTCAGCATA |
| At-GST-F           | GGCGATGACTTTGGCTATGT |
| At-GST-R           | CTTCTCAGGATCAGGCAAGG |
| At-GPX1-F          | TCCTCAGCAACCTTTCTCGT |
| At-GPX1-R          | CATCCTTCCCATCAATGTCC |
| At-GPX2-F          | CAAATGTGGTCTGACGGATG |
| At-GPX2-R          | GATGGGGAATTCAGCTTTGA |
| At-PER27-F         | GGTTGCACTTGAAGGACCAT |
| At-PER27-R         | GTGTGACCACCCGAGAGAAT |
| At-DOX1-F          | GGAATGAAGAAACCGCAAAA |

|              |                        |
|--------------|------------------------|
| At-DOX1-R    | CCTTGCGACCAATCAAATCT   |
| At-24170-F   | TTTTGCGAACACTGCTTTTG   |
| At-24170-R   | AGCCTGAGGTGAAGACCAGA   |
| At-PER35-F   | AATTCAACGGCATCAACTCC   |
| At-PER35-R   | TTTGAGGCCCAAGCATTAAAC  |
| At-TRX1-F    | TTGAGACATGGAACGAGCAG   |
| At-TRX1-R    | CCTGTATCGCCCAATCACTT   |
| At-EMB2360-F | AAGGCAAAGAAGGTGCTGA    |
| At-EMB2360-R | ACATGCGAAAATCCCTCAAC   |
| At-MSD2-F    | ATGGAACCGTGTCTCGAATC   |
| At-MSD2-R    | AGTTTGACGACGGAGGAGTG   |
| At-GPX5-F    | GTTTTCCAAAAGGTGCGTGT   |
| At-GPX5-R    | TTCTTGTGCAAGGGCTTTCT   |
| At-GSTF-F    | CAAGGAACCAACCTTCTCCA   |
| At-GSTF-R    | GCCTCCTCTTCTGCAACAAC   |
| At-APXS-F    | GGTCCTGAGGATTGTCCAGA   |
| At-APXS-R    | CTCCAGGTCCTTCTTTTCGTG  |
| At-GPX6-F    | ATTCGATTCTGCGAAACCAC   |
| At-GPX6-R    | CAAGCCACATTGAGAAGCAA   |
| At-PER45-F   | TAGGGAGGAGAGATGGCAGA   |
| At-PER45-R   | TCGGGTCGATACGTGTTGTA   |
| At-CAT2-F    | CGAGGTATGACCAGGTTTCGT  |
| At-CAT2-R    | AGGGCATCAATCCATCTCTG   |
| At-FSD3-F    | GGATGTGTGGGAGCACTCTT   |
| At-FSD3-R    | GATTGGGATGTTGGGTTTCCAC |
| At-PAP26-F   | ATAGCTGGGGTCGTTTTGTG   |
| At-PAP26-R   | CAAAAGGCGAATAGCTGGAG   |

---

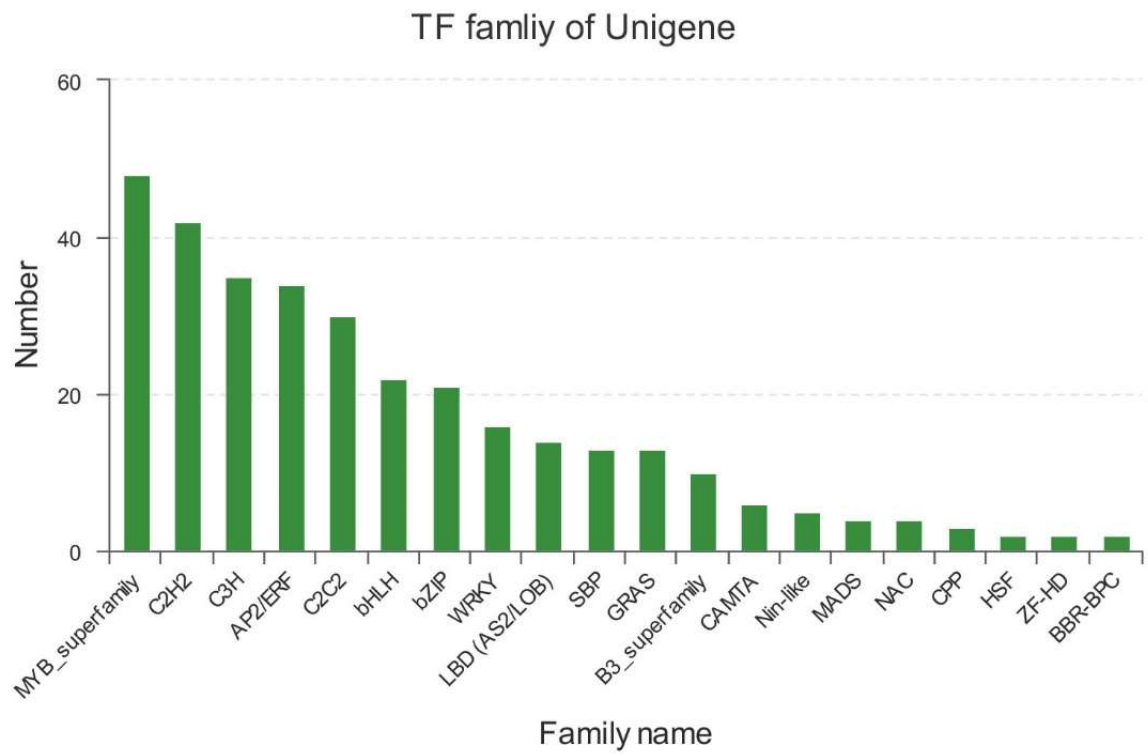

**Figure S1.** Transcription factors were founded in *Chlorella* sp. BLD through transcriptome analysis.

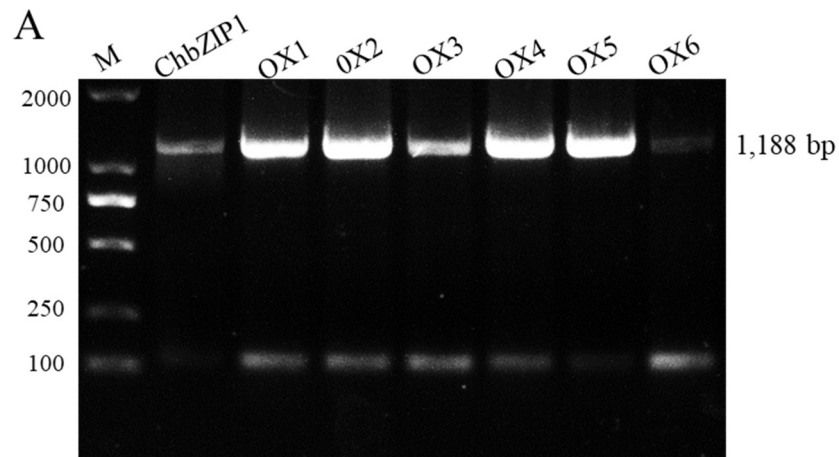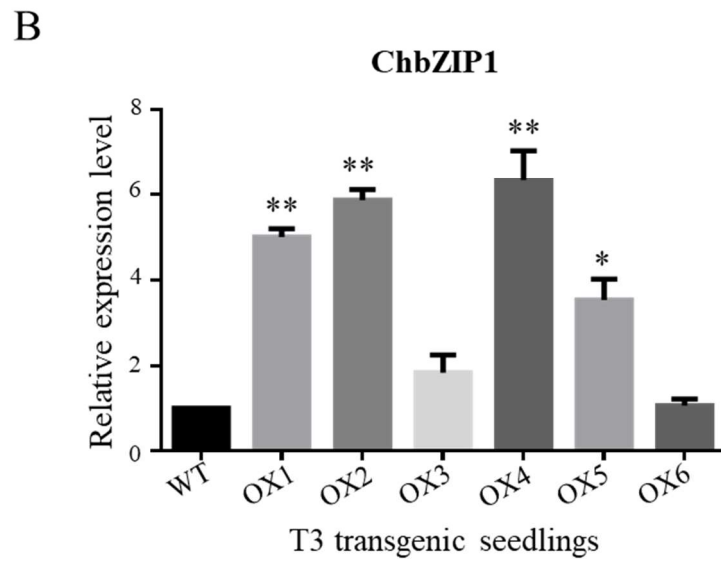

**Figure S2. Overexpressed ChbZIP1 in *Arabidopsis*. A. The band of ChbZIP1 was detected with PCR screening in the six T1 (OX1-6) lines. B. The mRNA expression level of ChbZIP1 in T3 transgenic lines.**
